# Supplementary material for: FluKB: A Knowledge-Based System for Influenza Vaccine Target Discovery and Analysis of the Immunological Properties of Influenza Viruses
Source: PubMed Central journal article supplement (PMC4609449; doi:10.1155/2015/380975), 2015-10-04
Supplement: 380975.f1.pdf [file 380975.f1.pdf]

# Supplemental Figures

## Sequence variability analysis

Sequence variability among a subset of influenza sequences is calculated using shannon entropy. Shannon entropy is a measure of disorder, or more precisely unpredictability.

Select sequences from a subset of strains

Protein:

Influenza Type:

Subtype:

Year:  -

Country:

Province:

Host:

Sequence Type:

 

Version 1.0, Jan 2014. Developed by Bioinformatics Core at [Cancer Vaccine Center](#), Dana-Farber Cancer Institute.

**Supplemental Figure S1:** The protein selection window that can be used to subset and filter the protein data in any way the user may prefer.

```

FLU0191750      MEQQQTLWTQSTEHTNIQRGGSGRQIQKLGHPSSSTQLMDHYLRIMNQVDMHKQTVSWRLWPSLKNPTQVSLRTHALKQNKPPNRQGWIN
FLU0171294      MEQQQTLWTQSTEHTNIQRGGSGRQIQKLGHPSSSTQLMDHYLRIMNQVDMHKQTVSWRLWPSLKNPTQVSLRTHALKQNKPPNRQGWIN
FLU0105161      MEQQQTPTWTRSTEHTNIQRGGSGRQIQKLGHPSSSTQLMDHYLRIMNQVDMHKQTVSWRLWPSLKNPTQVSLRTHALKQNKPPNRQGWIN
FLU0387210      MEQQQTLWTQSTEHTNIQRGGSGRQIQKLGHPSSSTQLMDHYLRIMNQVDMHKQTVSWRLWPSLKNPTQVSLRTHALKQNKPPNRQGWIN
FLU0009322      MEQQQTLWTQSTEHTNIQRGGSGRQIQKLGHPSSSTQLMDHYLRIMNQVDMHKQTVSWRLWPSLKNPTQVSLRTHALKQNKPPNRQGWIN
FLU0058125      MEQQQTLWTQSTEHTNIQRGGSGRQIQKLGHPSSSTQLMDHYLRIMNQVDMHKQTVSWRLWPSLKNPTQVSLRTHALKQNKPPNRQGWIN
FLU0347675      MEQQQTLWTQSTEHTNIQRGGSGRQIQKLGHPSSSTQLMDHYLRIMNQVDMHKQTVSWRLWPSLKNPTQVSLRTHALKQNKPPNRQGWIN
FLU0028571      MEQQQTLWTQSTEHTNIQRGGSGRQIQKLGHPSSSTQLMDHYLRIMNQVDMHKQTVSWRLWPSLKNPTQVSLRTHALKQNKPPNRQGWIN
FLU0031744      MEQQQTLWTQSTEHTNIQRGGSGRQIQKLGHPSSSTQLMDHYLRIMNQVDMHKQTVSWRLWPSLKNPTQVSLRTHALKQNKPPNRQGWIN
FLU0356552      MEQQQTLWTQSTEHTNIQRGGSGRQIQKLGHPSSSTQLMDHYLRIMNQVDMHKQTVSWRLWPSLKNPTQVSLRTHALKQNKPPNRQGWIN
FLU0324516      MEQQQTLWTQSTEHTNIQRGGSGRQIQKLGHPSSSTQLMDHYLRIMNQVDMHKQTVSWRLWPSLKNPTQVSLRTHALKQNKPPNRQGWIN
FLU0070941      MEQQQTLWTQSTEHTNIQRGGSGRQIQKLGHPSSSTQLMDHYLRIMNQVDMHKQTVSWRLWPSLKNPTQVSLRTHALKQNKPPNRQGWIN
FLU0063709      MEQQQTPTWTRSTEHTNIQRGGSGRQIQKLGHPSSSTQLMDHYLRIMNQVDMHKQTVSWRLWPSLKNPTQVSLRTHALKQNKPPNRQGWIN
FLU0346389      MEQQQTPTWTRSTEHTNIQRGGSGRQIQKLGHPSSSTQLMDHYLRIMNQVDMHKQTVSWRLWPSLKNPTQVSLRTHALKQNKPPNRQGWIN
FLU0018476      MEQQQTLWTQSTEHTNIQRGGSGRQIQKLGHPSSSTQLMDHYLRIMNQVDMHKQTVSWRLWPSLKNPTQVSLRTHALKQNKPPNRQGWIN
FLU0014456      MEQQQTLWTQSTEHTNIQRGGSGRQIQKLGHPSSSTQLMDHYLRIMNQVDMHKQTVSWRLWPSLKNPTQVSLRTHALKQNKPPNRQGWIN
FLU0233901      MEQQQTPTWTRSTEHTNIQRGGSGRQIQKLGHPSSSTQLMDHYLRIMNQVDMHKQTVSWRLWPSLKNPTQVSLRTHALKQNKPPNRQGWIN
FLU0372956      MEQQQTLWTQSTEHTNIQRGGSGRQIQKLGHPSSSTQLMDHYLRIMNQVDMHKQTVSWRLWPSLKNPTQVSLRTHALKQNKPPNRQGWIN
FLU0067284      MEQQQTLWTQSTEHTNIQRGGSGRQIQKLGHPSSSTQLMDHYLRIMNQVDMHKQTVSWRLWPSLKNPTQVSLRTHALKQNKPPNRQGWIN

```

**Supplemental Figure S2:** The result of a query using the protein selection window that can be used to select a specific subset of protein data using various combinations of protein, influenza type, subtype, range of years of identification, geographic origin (country, province), host, and sequence type.

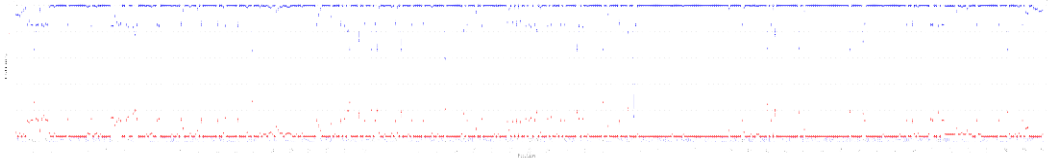

**Supplemental Figure S3:** An example output from the sequence variability analysis. The blue line display the percentage of sequences containing the consensus amino acids at a particular position in the alignment. The red line is the entropy of a given position in the alignment calculated by Shannon entropy. The example is a run from the setting shown in Supplemental Figure S1.

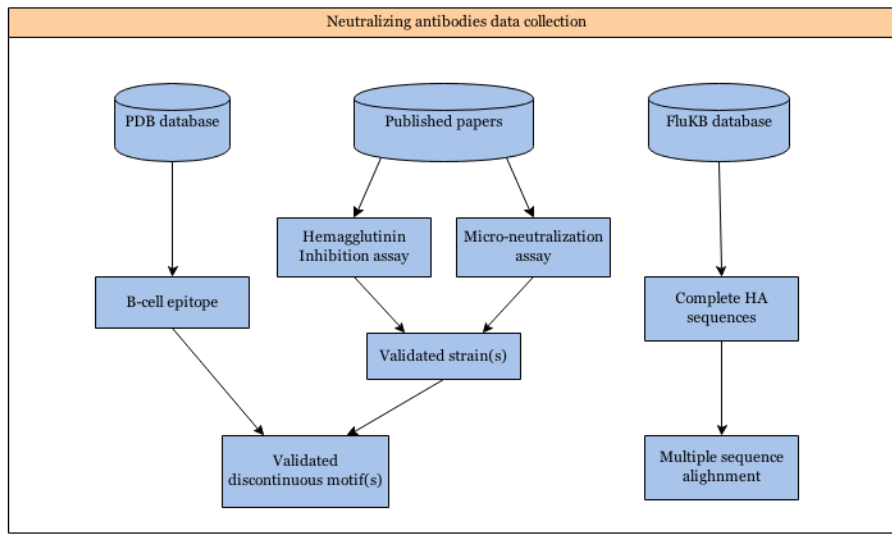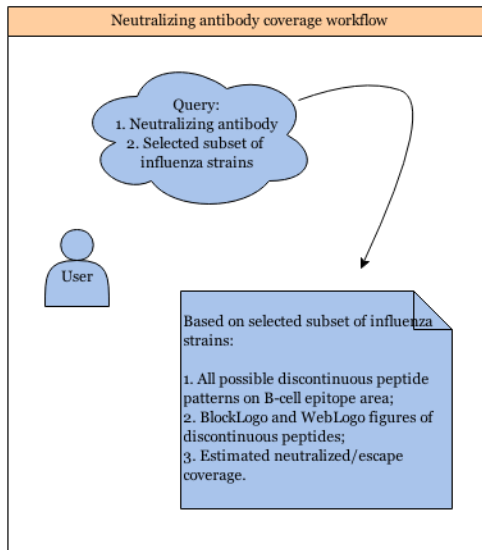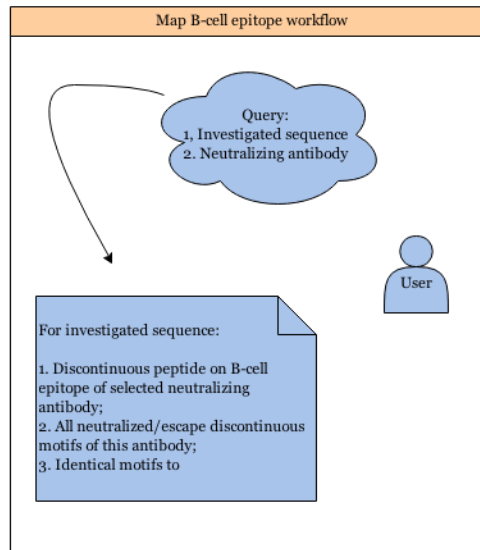

**Supplemental Figure S4: Neutralizing antibodies-related data collection and two antibody analysis workflows.** The upper panel shows the process of collection of neutralizing antibody-related information.

## Supplemental Tables

**Supplemental Table S1:** The list of GenBank accession numbers for the influenza reference sequences used in FluKB for protein annotations.

| <b>GB accession number for Influenza Virus A</b> |                                                                                           |
|--------------------------------------------------|-------------------------------------------------------------------------------------------|
| <b>HA</b>                                        | M55059 AB269693 DQ508897 M25290 X05907 M16740 AF091310 AY383755 AB275283 CY015073         |
| <b>M1</b>                                        | M63530 AY210059 M63522 CY015109 AF144306 CY009205 CY034125 CY021054 CY019796 CY006708     |
| <b>M2</b>                                        | CY014695 X08093 CY020438 CY034125 M63530 M65019 M63521 CY015104 M63529 CY006836           |
| <b>NA</b>                                        | K01393 AB276110 AB124654 D00715 D00715 AF250363 M38335 CY009206 CY020463 CY019797         |
| <b>NP</b>                                        | M27298 M27520 L07352 L07351 D00050 M22573 M30748 CY009207 CY005674 CY034127               |
| <b>NS1</b>                                       | CY016240 CY026215 CY034128 M25372 M25373 AY651565 AY651568 M80973 K00578 AF348198         |
| <b>NS2</b>                                       | AB275287 AF001663 CY020297 CY034128 CY009208 CY006711 CY026295 CY002500 M25372 M25369     |
| <b>PA</b>                                        | M26078 CY014699 M26084 NC_007376 AY210006 CY005676 CY009353 CY008681 CY026216 CY034129    |
| <b>PA-X</b>                                      | PODJW9 P0CK84 P0CK92 P0CK71 PODJU2 PODJW6 PODJV5 PODJS7 PODJV3 P0CK87                     |
| <b>PB1</b>                                       | M25929 M25930 M25931 M38376 M25935 DQ321291 AY651676 CY015113 CY015107 CY019801           |
| <b>PB1-F2</b>                                    | CY034130 CY009210 CY020443 CY014677 CY015095 CY014777 CY003742 CY007625 CY006050 CY002502 |
| <b>PB2</b>                                       | M38277 M73517 M73521 M73513 AY059525 AF348170 AY651751 CY034131 CY026218 CY009211         |
| <b>GB accession number for Influenza Virus B</b> |                                                                                           |
| <b>NS2</b>                                       | AB120446 AY582078 AY582083 AB120449 AF100399 AY687395 AY582075 AY582080 AY582081          |
| <b>BM2</b>                                       | M20175 M20176 AY260941 M14909 JN899476 AY581983 EU305617 JN899470 AY581975 AJ783374       |
| <b>HA</b>                                        | K00425 K00423 X17222 K00424 X53098 K02713 M58428 X00897 X13551 X13553                     |
| <b>M1</b>                                        | AY260941 NC_002210 M20175 M20176 M14909 AF077348 AY581975 AY581978 AY581978 AY581980      |
| <b>NA</b>                                        | M54967 J02095 M30632 M30633 M30634 M30635 M30636 M30637 M30638 M30639                     |
| <b>NB</b>                                        | J02095 M30637 M30633 M54967 M30631 M30632 M30634 M30635 M30636 M30639                     |
| <b>NP</b>                                        | NC_002208 K01395 X14217 M20173 M20174 AF005739 K01139 AF100367 AB036876 AY582020          |
| <b>NS1</b>                                       | M19796 M19788 M19790 M19792 M20225 M20224 M19786 M19795 M19794 M19791                     |
| <b>PA</b>                                        | NC_002206 M16711 M20171 M20172 AF005738 CY018738 CY018530 CY038292 EF626641 AY582032      |
| <b>PB1</b>                                       | M20479 NC_002204 M20169 AF005736 CY115117 CY119656 CY119560 CY119864 CY119832 CY119928    |
| <b>PB2</b>                                       | AF101982 M20163 M20168 AF005737 AY582060 AY582066 EU305612 EF626643 CY033859 CY019578     |
